# Supplementary material for: Testing the efficacy of atmospheric boundary layer height detection algorithms using uncrewed aircraft system data from MOSAiC
Source: Copernicus journal article supplement (doi:10.5194/amt-2021-383), 2022-01-03
Supplement: Supplementary file [file amt-2021-383-AC2-supplement.pdf]

## Figures accompanying the author comments

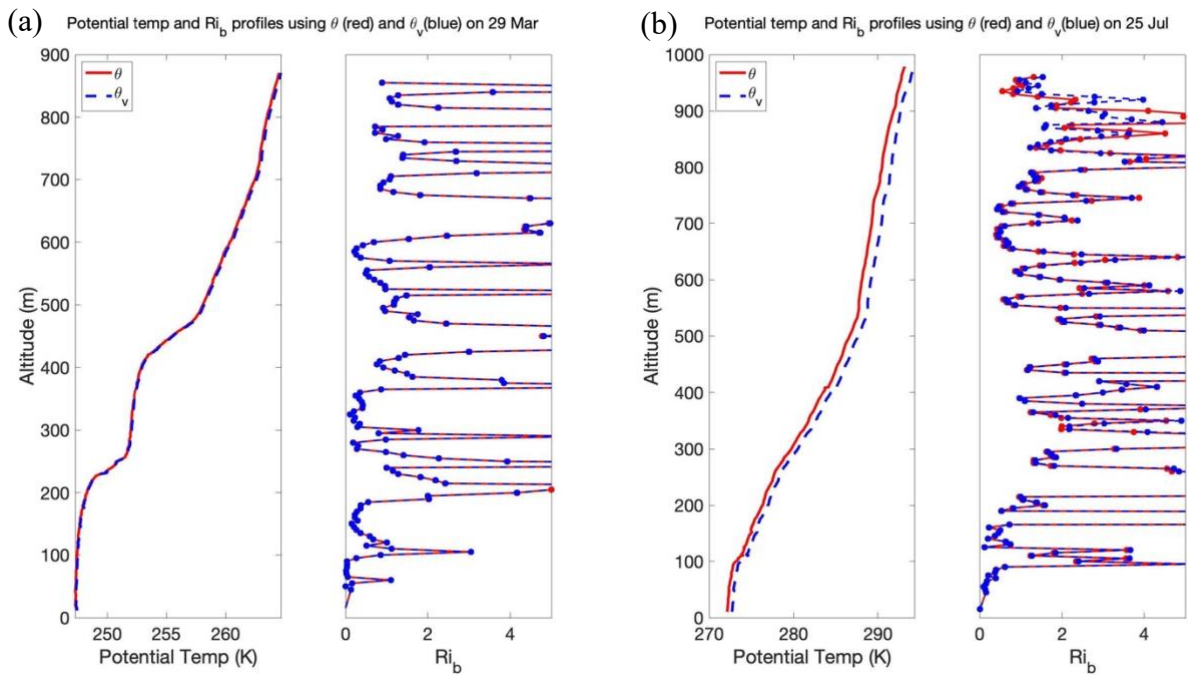

**Figure 1:** Two example flights, one during the coldest period sampled by the DH2 (a) and one during the warmest period sampled by the DH2 (b), showing the  $\theta$  and  $\theta_v$  profiles (left panel), as well as  $Ri_b$  profiles calculated from  $\theta$  and  $\theta_v$  (right panel) where profiles using  $\theta$  are in solid red and profiles using  $\theta_v$  are in dashed blue.

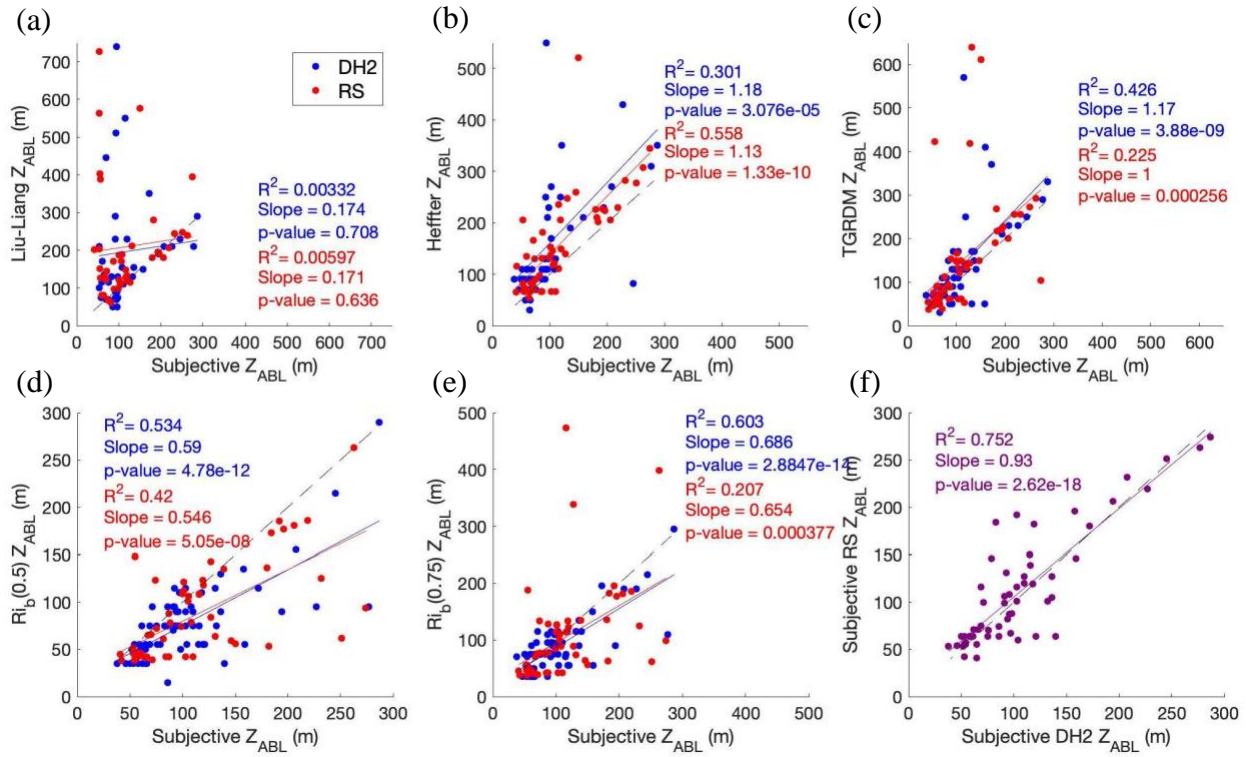

**Figure 2:** Figure identical to Figure 7 in the original manuscript (Figure 5 in the revised manuscript) using DataHawk2 data averaged in 20 m vertical bins to simulate data with 20 m vertical resolution.
